# Supplementary material for: An International Comparison of Presentation, Outcomes and CORONET Predictive Score Performance in Patients with Cancer Presenting with COVID-19 across Different Pandemic Waves
Source: MDPI journal article supplement (doi:10.3390/cancers14163931), 2022-08-16
Supplement: s1 [file s1]

## Supplementary Materials

**Supplementary Table S1.** Number of patients in the dataset obtained from 12 participating hospitals in the UK, 2 hospitals in Spain, 4 hospitals in the USA, and as part of the ESMO-CoCARE registry, hospitals throughout the world, excluding the USA, Canada and Latin America.

| <b>Cohort</b>         | <b>Total</b> | <b>1 D614G</b> | <b>2 Alpha</b> | <b>4 Omicron</b> |
|-----------------------|--------------|----------------|----------------|------------------|
| <b>United Kingdom</b> | 583          | 416            | 131            | 36               |
| <b>Spain</b>          | 239          | 119            | 93             | 27               |
| <b>ESMO Co-Care</b>   | 667          | 416            | 251            |                  |
| <b>USA</b>            | 194          | 194            |                |                  |
| <b>France</b>         | 178          | 178            |                |                  |
| <b>Denmark</b>        | 107          | 107            |                |                  |
| <b>Total</b>          | 1968         | 1430           | 475            | 63               |

**Supplementary Table S2.** Known features associated with COVID-19 severity compared between different waves, stratified by outcome.

| Feature                 | Wave | Outcomes                        | p-Value | Significance |
|-------------------------|------|---------------------------------|---------|--------------|
| Age                     | 1    | Discharged vs Admitted          | 0.0102  | *            |
|                         |      | Discharged vs Admitted+O2       | 0.0000  | ***          |
|                         |      | Discharged vs Admitted+O2+died  | 0.0000  | ***          |
|                         |      | Admitted vs Admitted+O2         | 0.0000  | ***          |
|                         |      | Admitted vs Admitted+O2+died    | 0.0000  | ***          |
|                         |      | Admitted+O2 vs Admitted+O2+died | 0.0055  | **           |
|                         | 2    | Discharged vs Admitted+O2       | 0.0000  | ***          |
|                         |      | Discharged vs Admitted+O2+died  | 0.0000  | ***          |
|                         |      | Admitted vs Admitted+O2         | 0.0247  | *            |
|                         |      | Admitted vs Admitted+O2+died    | 0.0037  | **           |
| Solid cancer stage      | 1    | Discharged vs Admitted          | 0.0000  | ***          |
|                         |      | Discharged vs Admitted+O2+died  | 0.0000  | ***          |
|                         |      | Admitted vs Admitted+O2         | 0.0099  | **           |
|                         |      | Admitted vs Admitted+O2+died    | 0.0000  | ***          |
|                         |      | Admitted+O2 vs Admitted+O2+died | 0.0001  | ***          |
|                         | 2    | Discharged vs Admitted          | 0.0215  | *            |
|                         |      | Discharged vs Admitted+O2       | 0.0001  | ***          |
|                         |      | Discharged vs Admitted+O2+died  | 0.0002  | ***          |
|                         |      | Discharged vs Admitted          | 0.0045  | **           |
|                         |      | Discharged vs Admitted+O2       | 0.0000  | ***          |
| NEWS2                   | 1    | Discharged vs Admitted+O2+died  | 0.0000  | ***          |
|                         |      | Admitted vs Admitted+O2         | 0.0000  | ***          |
|                         |      | Admitted vs Admitted+O2+died    | 0.0000  | ***          |
|                         |      | Discharged vs Admitted          | 0.0214  | *            |
|                         |      | Discharged vs Admitted+O2       | 0.0026  | **           |
|                         | 2    | Discharged vs Admitted+O2+died  | 0.0000  | ***          |
|                         |      | Admitted vs Admitted+O2+died    | 0.0000  | ***          |
|                         |      | Admitted+O2 vs Admitted+O2+died | 0.0000  | ***          |
|                         |      | Discharged vs Admitted+O2       | 0.0013  | **           |
|                         |      | Admitted vs Admitted+O2         | 0.0049  | **           |
| Performance status      | 1    | Discharged vs Admitted          | 0.0009  | ***          |
|                         |      | Discharged vs Admitted+O2       | 0.0000  | ***          |
|                         |      | Discharged vs Admitted+O2+died  | 0.0000  | ***          |
|                         |      | Admitted vs Admitted+O2+died    | 0.0000  | ***          |
|                         |      | Admitted+O2 vs Admitted+O2+died | 0.0002  | ***          |
| Total no. comorbidities | 1    | Discharged vs Admitted+O2       | 0.0000  | ***          |
|                         |      | Discharged vs Admitted+O2+died  | 0.0000  | ***          |
|                         |      | Admitted vs Admitted+O2         | 0.0008  | ***          |
|                         |      | Admitted vs Admitted+O2+died    | 0.0000  | ***          |
|                         | 2    | Discharged vs Admitted+O2+died  | 0.0000  | ***          |
|                         |      | Admitted vs Admitted+O2+died    | 0.0001  | ***          |
|                         |      | Admitted+O2 vs Admitted+O2+died | 0.0018  | **           |
| Albumin                 | 1    | Discharged vs Admitted          | 0.0005  | ***          |
|                         |      | Discharged vs Admitted+O2       | 0.0000  | ***          |
|                         |      | Discharged vs Admitted+O2+died  | 0.0000  | ***          |
|                         |      | Admitted vs Admitted+O2         | 0.0000  | ***          |
|                         |      | Admitted vs Admitted+O2+died    | 0.0000  | ***          |
|                         | 2    | Discharged vs Admitted          | 0.0134  | *            |
|                         |      | Discharged vs Admitted+O2       | 0.0000  | ***          |
|                         |      | Discharged vs Admitted+O2+died  | 0.0000  | ***          |
|                         |      | Admitted vs Admitted+O2         | 0.0000  | ***          |
|                         |      | Admitted vs Admitted+O2+died    | 0.0000  | ***          |
|                         | 4    | Discharged vs Admitted+O2       | 0.0060  | **           |

|            |   |                                 |        |     |
|------------|---|---------------------------------|--------|-----|
| Platelets  | 1 | Discharged vs Admitted+O2       | 0.0449 | *   |
|            |   | Discharged vs Admitted+O2+died  | 0.0012 | **  |
|            |   | Admitted vs Admitted+O2+died    | 0.0012 | **  |
|            | 2 | Discharged vs Admitted+O2+died  | 0.0132 | *   |
| CRP        | 1 | Discharged vs Admitted          | 0.0000 | *** |
|            |   | Discharged vs Admitted+O2       | 0.0000 | *** |
|            |   | Discharged vs Admitted+O2+died  | 0.0000 | *** |
|            |   | Admitted vs Admitted+O2         | 0.0000 | *** |
|            |   | Admitted vs Admitted+O2+died    | 0.0000 | *** |
|            |   | Admitted+O2 vs Admitted+O2+died | 0.0089 | **  |
|            | 2 | Discharged vs Admitted          | 0.0139 | *   |
|            |   | Discharged vs Admitted+O2       | 0.0000 | *** |
|            |   | Discharged vs Admitted+O2+died  | 0.0000 | *** |
|            |   | Admitted vs Admitted+O2         | 0.0012 | **  |
|            |   | Admitted vs Admitted+O2+died    | 0.0000 | *** |
|            | 4 | Admitted+O2 vs Admitted+O2+died | 0.0118 | *   |
|            |   | Discharged vs Admitted          | 0.0117 | *   |
|            |   | Discharged vs Admitted+O2       | 0.0002 | *** |
|            |   | Discharged vs Admitted          | 0.0027 | **  |
| Lymphocyte | 1 | Discharged vs Admitted+O2       | 0.0062 | **  |
|            |   | Discharged vs Admitted+O2+died  | 0.0000 | *** |
|            |   | Admitted vs Admitted+O2+died    | 0.0036 | **  |
|            |   | Admitted+O2 vs Admitted+O2+died | 0.0018 | **  |
|            |   | Discharged vs Admitted          | 0.0035 | **  |
|            | 2 | Discharged vs Admitted+O2       | 0.0000 | *** |
|            |   | Discharged vs Admitted+O2+died  | 0.0000 | *** |
|            |   | Admitted vs Admitted+O2+died    | 0.0428 | *   |
| Neutrophil | 1 | Discharged vs Admitted+O2       | 0.0000 | *** |
|            |   | Discharged vs Admitted+O2+died  | 0.0000 | *** |
|            |   | Admitted vs Admitted+O2         | 0.0112 | *   |
|            |   | Admitted vs Admitted+O2+died    | 0.0001 | *** |
|            | 2 | Discharged vs Admitted+O2+died  | 0.0037 | **  |
|            | 4 | Discharged vs Admitted+O2       | 0.0176 | *   |
| NLR        | 1 | Discharged vs Admitted          | 0.0171 | *   |
|            |   | Discharged vs Admitted+O2       | 0.0000 | *** |
|            |   | Discharged vs Admitted+O2+died  | 0.0000 | *** |
|            |   | Admitted vs Admitted+O2+died    | 0.0000 | *** |
|            |   | Admitted+O2 vs Admitted+O2+died | 0.0014 | **  |
|            | 2 | Discharged vs Admitted          | 0.0010 | **  |
|            |   | Discharged vs Admitted+O2       | 0.0002 | *** |
|            |   | Discharged vs Admitted+O2+died  | 0.0000 | *** |
|            |   | Admitted vs Admitted+O2+died    | 0.0039 | **  |
|            |   | Admitted+O2 vs Admitted+O2+died | 0.0133 | *   |

Statistically significant differences between features within waves were marked by: \*\*\* -  $p < 0.001$ , \*\* -  $p < 0.01$ , \* -  $p < 0.05$ ; Mann-Whitney U and Chi<sup>2</sup> tests were used for numeric and categorical (solid cancer stage and performance status) features accordingly.  $p$  values were adjusted using Benjamini–Hochberg.

**Supplementary Table S3.** Number of patients selected for CORONET validation before and after exclusion based on the criteria for missing values.

| Country | No. patients in cohorts |         |           | No. patients used to evaluate CORONET |            |            |
|---------|-------------------------|---------|-----------|---------------------------------------|------------|------------|
|         | 1 D614G                 | 2 Alpha | 4 Omicron | 1 D614G                               | 2 Alpha    | 4 Omicron  |
| France  | 178                     |         |           | 123 (69.1%)                           |            |            |
| Denmark | 107                     |         |           | 92 (86%)                              |            |            |
| UK      | 43                      | 31      | 36        | 43 (100%)                             | 30 (96.8%) | 27 (75%)   |
| Spain   |                         | 20      | 27        |                                       | 18 (90%)   | 27 (100%)  |
| Total   | 328                     | 51      | 63        | 258 (78.7%)                           | 48 (94.1%) | 54 (85.7%) |

**Supplementary Table S4.** Predicted CORONET score for patients from wave D614G, Alpha and Omicron waves.

| Outcome                       | CORONET score, median [Q1,Q3] |                  |                  | Significant differences between waves* |
|-------------------------------|-------------------------------|------------------|------------------|----------------------------------------|
|                               | 1 D614G                       | 2 Alpha          | 4 Omicron        |                                        |
| Discharged                    | 0.8 [0.48,1.34]               | 1.01 [0.64,1.16] | 0.68 [0.57,0.93] | ns                                     |
| Admitted                      | 1.35 [0.88,1.81]              | 1.11 [0.86,1.29] | 1.21 [0.67,1.32] | ns                                     |
| Admitted+O <sub>2</sub>       | 1.92 [1.24,2.18]              | 1.5 [1.09,2.12]  | 1.89 [1.41,2.13] | ns                                     |
| Admitted+O <sub>2</sub> +died | 2.01 [1.57,2.38]              | 1.67 [1.38,1.74] | -                | ns                                     |

\* ns – non-significant, p-val > 0.05, Mann-Whitney U, p-values corrected for multiple testing using one-step Sidak correction.

**Supplementary Table S5.** Treatments for COVID-19 amongst patients used to evaluate CORONET.

|                         | 1 D614G              |                          |          | 2 Alpha              |                          |          | 4 Omicron            |                          |          |
|-------------------------|----------------------|--------------------------|----------|----------------------|--------------------------|----------|----------------------|--------------------------|----------|
|                         | No. Patients treated | No. Patients not treated | miss-ing | No. Patients treated | No. Patients not treated | miss-ing | No. Patients treated | No. Patients not treated | miss-ing |
| steroids                | 3 (21.4%)            | 11 (78.6%)               | 314      | 26 (54.2%)           | 22 (45.8%)               | 3        | 19 (41.3%)           | 27 (58.7%)               | 0        |
| remdesivir              | 1 (7.1%)             | 13 (92.9%)               | 314      | 3 (6.4%)             | 44 (93.6%)               | 4        | 0 (0%)               | 45 (100%)                | 1        |
| lipinovir               | 0 (0%)               | 14 (100%)                | 314      | 0 (0%)               | 47 (100%)                | 4        | 0 (0%)               | 46 (100%)                | 0        |
| interferon              | 0 (0%)               | 14 (100%)                | 314      | 0 (0%)               | 47 (100%)                | 4        | 0 (0%)               | 46 (100%)                | 0        |
| interferon beta         | 1 (7.1%)             | 13 (92.9%)               | 314      | 0 (0%)               | 47 (100%)                | 4        | 0 (0%)               | 46 (100%)                | 0        |
| anticoagulation prophyl | 12 (85.7%)           | 2 (14.3%)                | 314      | 24 (50%)             | 24 (50%)                 | 3        | 22 (47.8%)           | 24 (52.2%)               | 0        |
| anticoagulation treat   | 0 (0%)               | 14 (100%)                | 314      | 3 (6.5%)             | 43 (93.5%)               | 5        | 0 (0%)               | 46 (100%)                | 0        |
| antibiotic              | 10 (71.4%)           | 4 (28.6%)                | 314      | 30 (62.5%)           | 18 (37.5%)               | 3        | 17 (37%)             | 29 (63%)                 | 0        |
| plasma                  | 0 (0%)               | 14 (100%)                | 314      | 0 (0%)               | 47 (100%)                | 4        | 0 (0%)               | 46 (100%)                | 0        |
| tocilizumab             | 0 (0%)               | 14 (100%)                | 314      | 4 (8.5%)             | 43 (91.5%)               | 4        | 2 (4.3%)             | 44 (95.7%)               | 0        |
| nebulised interferonb   | 0 (0%)               | 14 (100%)                | 314      | 0 (0%)               | 47 (100%)                | 4        | 0 (0%)               | 46 (100%)                | 0        |
| hydroxychloroquine      | 0 (0%)               | 14 (100%)                | 314      | 0 (0%)               | 47 (100%)                | 4        | 0 (0%)               | 46 (100%)                | 0        |
| aspirin                 | 0 (0%)               | 14 (100%)                | 314      | 1 (2.1%)             | 46 (97.9%)               | 4        | 0 (0%)               | 46 (100%)                | 0        |
| baricitinib             | 0 (0%)               | 14 (100%)                | 314      | 0 (0%)               | 47 (100%)                | 4        | 0 (0%)               | 46 (100%)                | 0        |
| molnupiravir            |                      |                          | 328      |                      |                          | 51       | 0 (0%)               | 42 (100%)                | 4        |
| sotrovimab              |                      |                          | 328      |                      |                          | 51       | 0 (0%)               | 42 (100%)                | 4        |
| other drug              |                      |                          | 328      |                      |                          | 51       |                      |                          | 46       |

**Supplementary Table S6.** Sensitivity, specificity, Positive Predictive Value and Negative Predictive Value for admission, requirement for oxygen in relation to the threshold defined by the CORONET score for 258 patients from D614G wave. Row highlighted in grey signifies the admission threshold.

|        | Total # of<br>threshold pts above<br>threshold | Admission |     |     |    |             |             |      |      |          | Requirement for O2 |     |     |     |             |             |      |      |          |
|--------|------------------------------------------------|-----------|-----|-----|----|-------------|-------------|------|------|----------|--------------------|-----|-----|-----|-------------|-------------|------|------|----------|
|        |                                                | TN        | FN  | TP  | FP | Sensitivity | Specificity | PPV  | NPV  | Accuracy | TN                 | FN  | TP  | FP  | Sensitivity | Specificity | PPV  | NPV  | Accuracy |
| >= 0.2 | 258                                            | 0         | 0   | 216 | 42 | 1.00        | 0.00        | 0.84 | -    | 0.84     | 0                  | 0   | 110 | 148 | 1.00        | 0.00        | 0.43 | -    | 0.43     |
| >= 0.3 | 256                                            | 1         | 1   | 215 | 41 | 1.00        | 0.02        | 0.84 | 0.50 | 0.84     | 2                  | 0   | 110 | 146 | 1.00        | 0.01        | 0.43 | 1.00 | 0.43     |
| >= 0.4 | 245                                            | 8         | 5   | 211 | 34 | 0.98        | 0.19        | 0.86 | 0.62 | 0.85     | 13                 | 0   | 110 | 135 | 1.00        | 0.09        | 0.45 | 1.00 | 0.48     |
| >= 0.5 | 238                                            | 12        | 8   | 208 | 30 | 0.96        | 0.29        | 0.87 | 0.60 | 0.85     | 20                 | 0   | 110 | 128 | 1.00        | 0.14        | 0.46 | 1.00 | 0.50     |
| >= 0.6 | 227                                            | 16        | 15  | 201 | 26 | 0.93        | 0.38        | 0.89 | 0.52 | 0.84     | 30                 | 1   | 109 | 118 | 0.99        | 0.20        | 0.48 | 0.97 | 0.54     |
| >= 0.7 | 220                                            | 18        | 20  | 196 | 24 | 0.91        | 0.43        | 0.89 | 0.47 | 0.83     | 37                 | 1   | 109 | 111 | 0.99        | 0.25        | 0.50 | 0.97 | 0.57     |
| >= 0.8 | 210                                            | 22        | 26  | 190 | 20 | 0.88        | 0.52        | 0.90 | 0.46 | 0.82     | 46                 | 2   | 108 | 102 | 0.98        | 0.31        | 0.51 | 0.96 | 0.60     |
| >= 0.9 | 200                                            | 27        | 31  | 185 | 15 | 0.86        | 0.64        | 0.93 | 0.47 | 0.82     | 53                 | 5   | 105 | 95  | 0.95        | 0.36        | 0.53 | 0.91 | 0.61     |
| >= 1.0 | 189                                            | 28        | 41  | 175 | 14 | 0.81        | 0.67        | 0.93 | 0.41 | 0.79     | 62                 | 7   | 103 | 86  | <b>0.94</b> | 0.42        | 0.55 | 0.90 | 0.64     |
| >= 1.1 | 182                                            | 29        | 47  | 169 | 13 | 0.78        | 0.69        | 0.93 | 0.38 | 0.77     | 67                 | 9   | 101 | 81  | 0.92        | 0.45        | 0.55 | 0.88 | 0.65     |
| >= 1.2 | 174                                            | 31        | 53  | 163 | 11 | 0.75        | 0.74        | 0.94 | 0.37 | 0.75     | 72                 | 12  | 98  | 76  | 0.89        | 0.49        | 0.56 | 0.86 | 0.66     |
| >= 1.3 | 167                                            | 32        | 59  | 157 | 10 | 0.73        | 0.76        | 0.94 | 0.35 | 0.73     | 76                 | 15  | 95  | 72  | 0.86        | 0.51        | 0.57 | 0.84 | 0.66     |
| >= 1.4 | 159                                            | 32        | 67  | 149 | 10 | 0.69        | 0.76        | 0.94 | 0.32 | 0.70     | 83                 | 16  | 94  | 65  | 0.85        | 0.56        | 0.59 | 0.84 | 0.69     |
| >= 1.5 | 151                                            | 33        | 74  | 142 | 9  | 0.66        | 0.79        | 0.94 | 0.31 | 0.68     | 86                 | 21  | 89  | 62  | 0.81        | 0.58        | 0.59 | 0.80 | 0.68     |
| >= 1.6 | 136                                            | 35        | 87  | 129 | 7  | 0.60        | 0.83        | 0.95 | 0.29 | 0.64     | 96                 | 26  | 84  | 52  | 0.76        | 0.65        | 0.62 | 0.79 | 0.70     |
| >= 1.7 | 127                                            | 36        | 95  | 121 | 6  | 0.56        | 0.86        | 0.95 | 0.27 | 0.61     | 102                | 29  | 81  | 46  | 0.74        | 0.69        | 0.64 | 0.78 | 0.71     |
| >= 1.8 | 115                                            | 37        | 106 | 110 | 5  | 0.51        | 0.88        | 0.96 | 0.26 | 0.57     | 109                | 34  | 76  | 39  | 0.69        | 0.74        | 0.66 | 0.76 | 0.72     |
| >= 1.9 | 101                                            | 40        | 117 | 99  | 2  | 0.46        | 0.95        | 0.98 | 0.25 | 0.54     | 118                | 39  | 71  | 30  | 0.65        | 0.80        | 0.70 | 0.75 | 0.73     |
| >= 2.0 | 82                                             | 41        | 135 | 81  | 1  | 0.38        | 0.98        | 0.99 | 0.23 | 0.47     | 124                | 52  | 58  | 24  | 0.53        | 0.84        | 0.71 | 0.70 | 0.71     |
| >= 2.1 | 64                                             | 41        | 153 | 63  | 1  | 0.29        | 0.98        | 0.98 | 0.21 | 0.40     | 126                | 68  | 42  | 22  | 0.38        | 0.85        | 0.66 | 0.65 | 0.65     |
| >= 2.2 | 52                                             | 41        | 165 | 51  | 1  | 0.24        | 0.98        | 0.98 | 0.20 | 0.36     | 130                | 76  | 34  | 18  | 0.31        | 0.88        | 0.65 | 0.63 | 0.64     |
| >= 2.3 | 45                                             | 41        | 172 | 44  | 1  | 0.20        | 0.98        | 0.98 | 0.19 | 0.33     | 133                | 80  | 30  | 15  | 0.27        | 0.90        | 0.67 | 0.62 | 0.63     |
| >= 2.4 | 35                                             | 41        | 182 | 34  | 1  | 0.16        | 0.98        | 0.97 | 0.18 | 0.29     | 135                | 88  | 22  | 13  | 0.20        | 0.91        | 0.63 | 0.61 | 0.61     |
| >= 2.5 | 24                                             | 42        | 192 | 24  | 0  | 0.11        | 1.00        | 1.00 | 0.18 | 0.26     | 137                | 97  | 13  | 11  | 0.12        | 0.93        | 0.54 | 0.59 | 0.58     |
| >= 2.6 | 16                                             | 42        | 200 | 16  | 0  | 0.07        | 1.00        | 1.00 | 0.17 | 0.22     | 142                | 100 | 10  | 6   | 0.09        | 0.96        | 0.63 | 0.59 | 0.59     |
| >= 2.7 | 6                                              | 42        | 210 | 6   | 0  | 0.03        | 1.00        | 1.00 | 0.17 | 0.19     | 147                | 105 | 5   | 1   | 0.05        | 0.99        | 0.83 | 0.58 | 0.59     |
| >= 2.8 | 2                                              | 42        | 214 | 2   | 0  | 0.01        | 1.00        | 1.00 | 0.16 | 0.17     | 147                | 109 | 1   | 1   | 0.01        | 0.99        | 0.50 | 0.57 | 0.57     |
| >= 2.9 | 0                                              | 42        | 216 | 0   | 0  | 0.00        | 1.00        | -    | 0.16 | 0.16     | 148                | 110 | 0   | 0   | 0.00        | 1.00        | -    | 0.57 | 0.57     |

**Supplementary Table S7.** Sensitivity, specificity, Positive Predictive Value and Negative Predictive Value for admission, requirement for oxygen in relation to the threshold defined by the CORONET score for 48 patients from Alpha wave. Row highlighted in grey signifies the admission threshold.

|        |                                                | Admission |    |    |    |             |             |      |      |          | Requirement for O2 |    |    |    |             |             |      |      |          |
|--------|------------------------------------------------|-----------|----|----|----|-------------|-------------|------|------|----------|--------------------|----|----|----|-------------|-------------|------|------|----------|
|        | Total # of<br>threshold pts above<br>threshold | TN        | FN | TP | FP | Sensitivity | Specificity | PPV  | NPV  | Accuracy | TN                 | FN | TP | FP | Sensitivity | Specificity | PPV  | NPV  | Accuracy |
| >= 0.2 | 48                                             | 0         | 0  | 40 | 8  | 1.00        | 0.00        | 0.83 | -    | 0.83     | 0                  | 0  | 27 | 21 | 1.00        | 0.00        | 0.56 | -    | 0.56     |
| >= 0.3 | 48                                             | 0         | 0  | 40 | 8  | 1.00        | 0.00        | 0.83 | -    | 0.83     | 0                  | 0  | 27 | 21 | 1.00        | 0.00        | 0.56 | -    | 0.56     |
| >= 0.4 | 48                                             | 0         | 0  | 40 | 8  | 1.00        | 0.00        | 0.83 | -    | 0.83     | 0                  | 0  | 27 | 21 | 1.00        | 0.00        | 0.56 | -    | 0.56     |
| >= 0.5 | 46                                             | 1         | 1  | 39 | 7  | 0.98        | 0.13        | 0.85 | 0.50 | 0.83     | 2                  | 0  | 27 | 19 | 1.00        | 0.10        | 0.59 | 1.00 | 0.60     |
| >= 0.6 | 44                                             | 2         | 2  | 38 | 6  | 0.95        | 0.25        | 0.86 | 0.50 | 0.83     | 4                  | 0  | 27 | 17 | 1.00        | 0.19        | 0.61 | 1.00 | 0.65     |
| >= 0.7 | 42                                             | 3         | 3  | 37 | 5  | 0.93        | 0.38        | 0.88 | 0.50 | 0.83     | 6                  | 0  | 27 | 15 | 1.00        | 0.29        | 0.64 | 1.00 | 0.69     |
| >= 0.8 | 41                                             | 3         | 4  | 36 | 5  | 0.90        | 0.38        | 0.88 | 0.43 | 0.81     | 6                  | 1  | 26 | 15 | 0.96        | 0.29        | 0.63 | 0.86 | 0.67     |
| >= 0.9 | 37                                             | 3         | 8  | 32 | 5  | 0.80        | 0.38        | 0.86 | 0.27 | 0.73     | 8                  | 3  | 24 | 13 | 0.89        | 0.38        | 0.65 | 0.73 | 0.67     |
| >= 1.0 | 35                                             | 4         | 9  | 31 | 4  | 0.78        | 0.50        | 0.89 | 0.31 | 0.73     | 10                 | 3  | 24 | 11 | 0.89        | 0.48        | 0.69 | 0.77 | 0.71     |
| >= 1.1 | 31                                             | 5         | 12 | 28 | 3  | 0.70        | 0.63        | 0.90 | 0.29 | 0.69     | 11                 | 6  | 21 | 10 | 0.78        | 0.52        | 0.68 | 0.65 | 0.67     |
| >= 1.2 | 27                                             | 6         | 15 | 25 | 2  | 0.63        | 0.75        | 0.93 | 0.29 | 0.65     | 14                 | 7  | 20 | 7  | 0.74        | 0.67        | 0.74 | 0.67 | 0.71     |
| >= 1.3 | 22                                             | 7         | 19 | 21 | 1  | 0.53        | 0.88        | 0.95 | 0.27 | 0.58     | 17                 | 9  | 18 | 4  | 0.67        | 0.81        | 0.82 | 0.65 | 0.73     |
| >= 1.4 | 19                                             | 7         | 22 | 18 | 1  | 0.45        | 0.88        | 0.95 | 0.24 | 0.52     | 18                 | 11 | 16 | 3  | 0.59        | 0.86        | 0.84 | 0.62 | 0.71     |
| >= 1.5 | 17                                             | 7         | 24 | 16 | 1  | 0.40        | 0.88        | 0.94 | 0.23 | 0.48     | 18                 | 13 | 14 | 3  | 0.52        | 0.86        | 0.82 | 0.58 | 0.67     |
| >= 1.6 | 14                                             | 7         | 27 | 13 | 1  | 0.33        | 0.88        | 0.93 | 0.21 | 0.42     | 19                 | 15 | 12 | 2  | 0.44        | 0.90        | 0.86 | 0.56 | 0.65     |
| >= 1.7 | 13                                             | 7         | 28 | 12 | 1  | 0.30        | 0.88        | 0.92 | 0.20 | 0.40     | 19                 | 16 | 11 | 2  | 0.41        | 0.90        | 0.85 | 0.54 | 0.63     |
| >= 1.8 | 11                                             | 7         | 30 | 10 | 1  | 0.25        | 0.88        | 0.91 | 0.19 | 0.35     | 19                 | 18 | 9  | 2  | 0.33        | 0.90        | 0.82 | 0.51 | 0.58     |
| >= 1.9 | 11                                             | 7         | 30 | 10 | 1  | 0.25        | 0.88        | 0.91 | 0.19 | 0.35     | 19                 | 18 | 9  | 2  | 0.33        | 0.90        | 0.82 | 0.51 | 0.58     |
| >= 2.0 | 11                                             | 7         | 30 | 10 | 1  | 0.25        | 0.88        | 0.91 | 0.19 | 0.35     | 19                 | 18 | 9  | 2  | 0.33        | 0.90        | 0.82 | 0.51 | 0.58     |
| >= 2.1 | 8                                              | 7         | 33 | 7  | 1  | 0.18        | 0.88        | 0.88 | 0.18 | 0.29     | 20                 | 20 | 7  | 1  | 0.26        | 0.95        | 0.88 | 0.50 | 0.56     |
| >= 2.2 | 4                                              | 8         | 36 | 4  | 0  | 0.10        | 1.00        | 1.00 | 0.18 | 0.25     | 21                 | 23 | 4  | 0  | 0.15        | 1.00        | 1.00 | 0.48 | 0.52     |
| >= 2.3 | 4                                              | 8         | 36 | 4  | 0  | 0.10        | 1.00        | 1.00 | 0.18 | 0.25     | 21                 | 23 | 4  | 0  | 0.15        | 1.00        | 1.00 | 0.48 | 0.52     |
| >= 2.4 | 3                                              | 8         | 37 | 3  | 0  | 0.08        | 1.00        | 1.00 | 0.18 | 0.23     | 21                 | 24 | 3  | 0  | 0.11        | 1.00        | 1.00 | 0.47 | 0.50     |
| >= 2.5 | 2                                              | 8         | 38 | 2  | 0  | 0.05        | 1.00        | 1.00 | 0.17 | 0.21     | 21                 | 25 | 2  | 0  | 0.07        | 1.00        | 1.00 | 0.46 | 0.48     |
| >= 2.6 | 2                                              | 8         | 38 | 2  | 0  | 0.05        | 1.00        | 1.00 | 0.17 | 0.21     | 21                 | 25 | 2  | 0  | 0.07        | 1.00        | 1.00 | 0.46 | 0.48     |
| >= 2.7 | 2                                              | 8         | 38 | 2  | 0  | 0.05        | 1.00        | 1.00 | 0.17 | 0.21     | 21                 | 25 | 2  | 0  | 0.07        | 1.00        | 1.00 | 0.46 | 0.48     |
| >= 2.8 | 0                                              | 8         | 40 | 0  | 0  | 0.00        | 1.00        | -    | 0.17 | 0.17     | 21                 | 27 | 0  | 0  | 0.00        | 1.00        | -    | 0.44 | 0.44     |
| >= 2.9 | 0                                              | 8         | 40 | 0  | 0  | 0.00        | 1.00        | -    | 0.17 | 0.17     | 21                 | 27 | 0  | 0  | 0.00        | 1.00        | -    | 0.44 | 0.44     |

**Supplementary Table S8.** Sensitivity, specificity, Positive Predictive Value and Negative Predictive Value for admission, requirement for oxygen in relation to the threshold defined by the CORONET score for 54 patients from Omicron wave. Row highlighted in grey signifies the admission threshold.

| threshold | Total # of<br>pts<br>above<br>thresh-<br>old | Admission |    |    |    |             |             |      |      |          | Requirement for O2 |    |    |    |             |             |      |      |          |
|-----------|----------------------------------------------|-----------|----|----|----|-------------|-------------|------|------|----------|--------------------|----|----|----|-------------|-------------|------|------|----------|
|           |                                              | TN        | FN | TP | FP | Sensitivity | Specificity | PPV  | NPV  | Accuracy | TN                 | FN | TP | FP | Sensitivity | Specificity | PPV  | NPV  | Accuracy |
| >= 0.2    | 54                                           | 0         | 0  | 36 | 18 | 1.00        | 0.00        | 0.67 | -    | 0.67     | 0                  | 0  | 18 | 36 | 1.00        | 0.00        | 0.33 | -    | 0.33     |
| >= 0.3    | 54                                           | 0         | 0  | 36 | 18 | 1.00        | 0.00        | 0.67 | -    | 0.67     | 0                  | 0  | 18 | 36 | 1.00        | 0.00        | 0.33 | -    | 0.33     |
| >= 0.4    | 52                                           | 1         | 1  | 35 | 17 | 0.97        | 0.06        | 0.67 | 0.50 | 0.67     | 2                  | 0  | 18 | 34 | 1.00        | 0.06        | 0.35 | 1.00 | 0.37     |
| >= 0.5    | 49                                           | 2         | 3  | 33 | 16 | 0.92        | 0.11        | 0.67 | 0.40 | 0.65     | 5                  | 0  | 18 | 31 | 1.00        | 0.14        | 0.37 | 1.00 | 0.43     |
| >= 0.6    | 45                                           | 6         | 3  | 33 | 12 | 0.92        | 0.33        | 0.73 | 0.67 | 0.72     | 9                  | 0  | 18 | 27 | 1.00        | 0.25        | 0.40 | 1.00 | 0.50     |
| >= 0.7    | 40                                           | 9         | 5  | 31 | 9  | 0.86        | 0.50        | 0.78 | 0.64 | 0.74     | 14                 | 0  | 18 | 22 | 1.00        | 0.39        | 0.45 | 1.00 | 0.59     |
| >= 0.8    | 35                                           | 11        | 8  | 28 | 7  | 0.78        | 0.61        | 0.80 | 0.58 | 0.72     | 18                 | 1  | 17 | 18 | 0.94        | 0.50        | 0.49 | 0.95 | 0.65     |
| >= 0.9    | 32                                           | 12        | 10 | 26 | 6  | 0.72        | 0.67        | 0.81 | 0.55 | 0.70     | 20                 | 2  | 16 | 16 | 0.89        | 0.56        | 0.50 | 0.91 | 0.67     |
| >= 1.0    | 29                                           | 15        | 10 | 26 | 3  | 0.72        | 0.83        | 0.90 | 0.60 | 0.76     | 23                 | 2  | 16 | 13 | 0.89        | 0.64        | 0.55 | 0.92 | 0.72     |
| >= 1.1    | 28                                           | 15        | 11 | 25 | 3  | 0.69        | 0.83        | 0.89 | 0.58 | 0.74     | 23                 | 3  | 15 | 13 | 0.83        | 0.64        | 0.54 | 0.88 | 0.70     |
| >= 1.2    | 26                                           | 16        | 12 | 24 | 2  | 0.67        | 0.89        | 0.92 | 0.57 | 0.74     | 25                 | 3  | 15 | 11 | 0.83        | 0.69        | 0.58 | 0.89 | 0.74     |
| >= 1.3    | 23                                           | 16        | 15 | 21 | 2  | 0.58        | 0.89        | 0.91 | 0.52 | 0.69     | 28                 | 3  | 15 | 8  | 0.83        | 0.78        | 0.65 | 0.90 | 0.80     |
| >= 1.4    | 19                                           | 16        | 19 | 17 | 2  | 0.47        | 0.89        | 0.89 | 0.46 | 0.61     | 30                 | 5  | 13 | 6  | 0.72        | 0.83        | 0.68 | 0.86 | 0.80     |
| >= 1.5    | 16                                           | 17        | 21 | 15 | 1  | 0.42        | 0.94        | 0.94 | 0.45 | 0.59     | 32                 | 6  | 12 | 4  | 0.67        | 0.89        | 0.75 | 0.84 | 0.81     |
| >= 1.6    | 14                                           | 18        | 22 | 14 | 0  | 0.39        | 1.00        | 1.00 | 0.45 | 0.59     | 34                 | 6  | 12 | 2  | 0.67        | 0.94        | 0.86 | 0.85 | 0.85     |
| >= 1.7    | 13                                           | 18        | 23 | 13 | 0  | 0.36        | 1.00        | 1.00 | 0.44 | 0.57     | 34                 | 7  | 11 | 2  | 0.61        | 0.94        | 0.85 | 0.83 | 0.83     |
| >= 1.8    | 12                                           | 18        | 24 | 12 | 0  | 0.33        | 1.00        | 1.00 | 0.43 | 0.56     | 34                 | 8  | 10 | 2  | 0.56        | 0.94        | 0.83 | 0.81 | 0.81     |
| >= 1.9    | 10                                           | 18        | 26 | 10 | 0  | 0.28        | 1.00        | 1.00 | 0.41 | 0.52     | 34                 | 10 | 8  | 2  | 0.44        | 0.94        | 0.80 | 0.77 | 0.78     |
| >= 2.0    | 7                                            | 18        | 29 | 7  | 0  | 0.19        | 1.00        | 1.00 | 0.38 | 0.46     | 35                 | 12 | 6  | 1  | 0.33        | 0.97        | 0.86 | 0.74 | 0.76     |
| >= 2.1    | 6                                            | 18        | 30 | 6  | 0  | 0.17        | 1.00        | 1.00 | 0.38 | 0.44     | 35                 | 13 | 5  | 1  | 0.28        | 0.97        | 0.83 | 0.73 | 0.74     |
| >= 2.2    | 4                                            | 18        | 32 | 4  | 0  | 0.11        | 1.00        | 1.00 | 0.36 | 0.41     | 35                 | 15 | 3  | 1  | 0.17        | 0.97        | 0.75 | 0.70 | 0.70     |
| >= 2.3    | 2                                            | 18        | 34 | 2  | 0  | 0.06        | 1.00        | 1.00 | 0.35 | 0.37     | 36                 | 16 | 2  | 0  | 0.11        | 1.00        | 1.00 | 0.69 | 0.70     |
| >= 2.4    | 1                                            | 18        | 35 | 1  | 0  | 0.03        | 1.00        | 1.00 | 0.34 | 0.35     | 36                 | 17 | 1  | 0  | 0.06        | 1.00        | 1.00 | 0.68 | 0.69     |
| >= 2.5    | 1                                            | 18        | 35 | 1  | 0  | 0.03        | 1.00        | 1.00 | 0.34 | 0.35     | 36                 | 17 | 1  | 0  | 0.06        | 1.00        | 1.00 | 0.68 | 0.69     |
| >= 2.6    | 0                                            | 18        | 36 | 0  | 0  | 0.00        | 1.00        | -    | 0.33 | 0.33     | 36                 | 18 | 0  | 0  | 0.00        | 1.00        | -    | 0.67 | 0.67     |
| >= 2.7    | 0                                            | 18        | 36 | 0  | 0  | 0.00        | 1.00        | -    | 0.33 | 0.33     | 36                 | 18 | 0  | 0  | 0.00        | 1.00        | -    | 0.67 | 0.67     |
| >= 2.8    | 0                                            | 18        | 36 | 0  | 0  | 0.00        | 1.00        | -    | 0.33 | 0.33     | 36                 | 18 | 0  | 0  | 0.00        | 1.00        | -    | 0.67 | 0.67     |
| >= 2.9    | 0                                            | 18        | 36 | 0  | 0  | 0.00        | 1.00        | -    | 0.33 | 0.33     | 36                 | 18 | 0  | 0  | 0.00        | 1.00        | -    | 0.67 | 0.67     |
